# Supplementary material for: Repair of segmental rabbit radial defects with Cu/Zn co-doped calcium phosphate scaffolds incorporating GDF-5 carrier
Source: Royal Society of Chemistry journal article supplement (doi:10.1039/c9ra09626d), 2020-01-01
Supplement: c9ra09626d1.pdf [file c9ra09626d1.pdf]

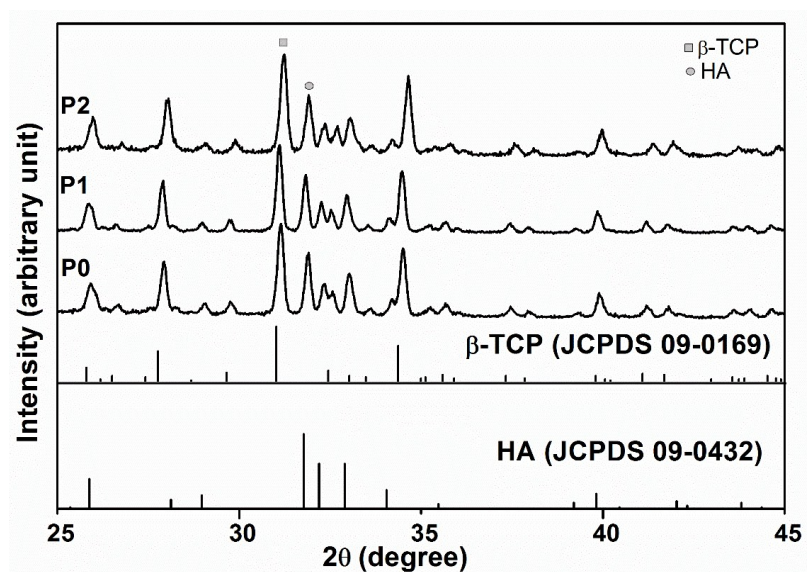

Supplementary Fig. S1 XRD patterns of various scaffolds

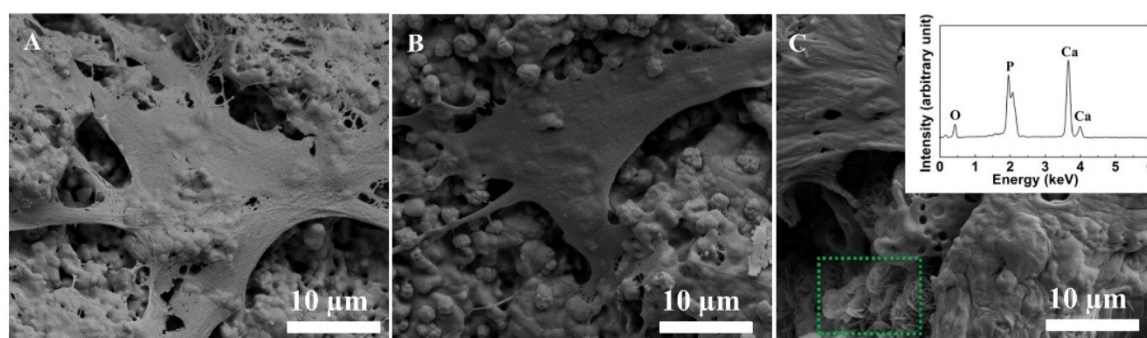

Supplementary Fig. S2 SEM images of cell attachment and apatite formation on various scaffolds: (A) P0, (B) P1 and (C) P2 (inset: EDX spectrum of the surface structure (green dashed line)).
